# Supplementary material for: The gut microbiota modulates brain network connectivity under physiological conditions and after acute brain ischemia
Source: PubMed Central journal article supplement — iScience. 2021 Sep 9;24(10):103095. doi: 10.1016/j.isci.2021.103095 (PMC8479691; doi:10.1016/j.isci.2021.103095), 2021-09-09
Supplement: mmc1.pdf [file mmc1.pdf]

**iScience, Volume 24**

**Supplemental information**

**The gut microbiota modulates brain  
network connectivity under physiological  
conditions and after acute brain ischemia**

**Markus Aswendt, Claudia Green, Rebecca Sadler, Gemma Llovera, Lauren Dzikowski, Steffanie Heindl, Mercedes Gomez de Agüero, Michael Diedenhofen, Stefanie Vogel, Frederique Wieters, Dirk Wiedermann, Arthur Liesz, and Mathias Hoehn**

**SUPPLEMENTAL INFORMATION**

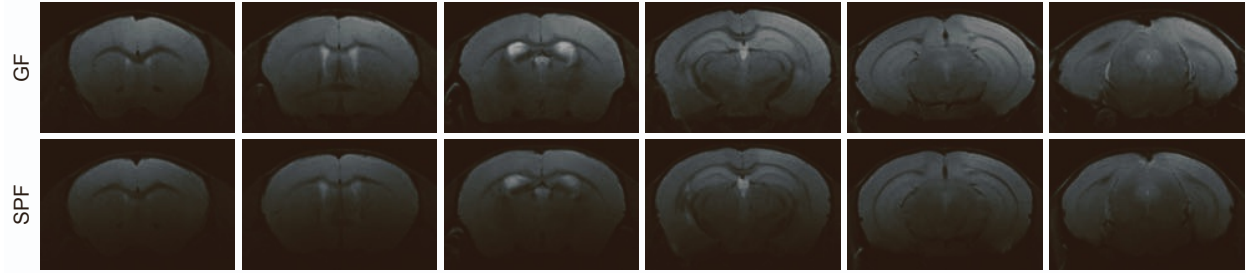

**Figure S1: Anatomical MR imaging of representative naïve GF and SPF mice, related to STAR methods section “MRI data acquisition”.**

Multi-slice coronal T2-weighted RARE images covering the whole cerebrum of representative animals of the germ-free (GF) and SPF held group. These high-resolution images at 68 μm in-plane resolution do not allow the detection of anatomical differences induced by the lack of gut microbiota.

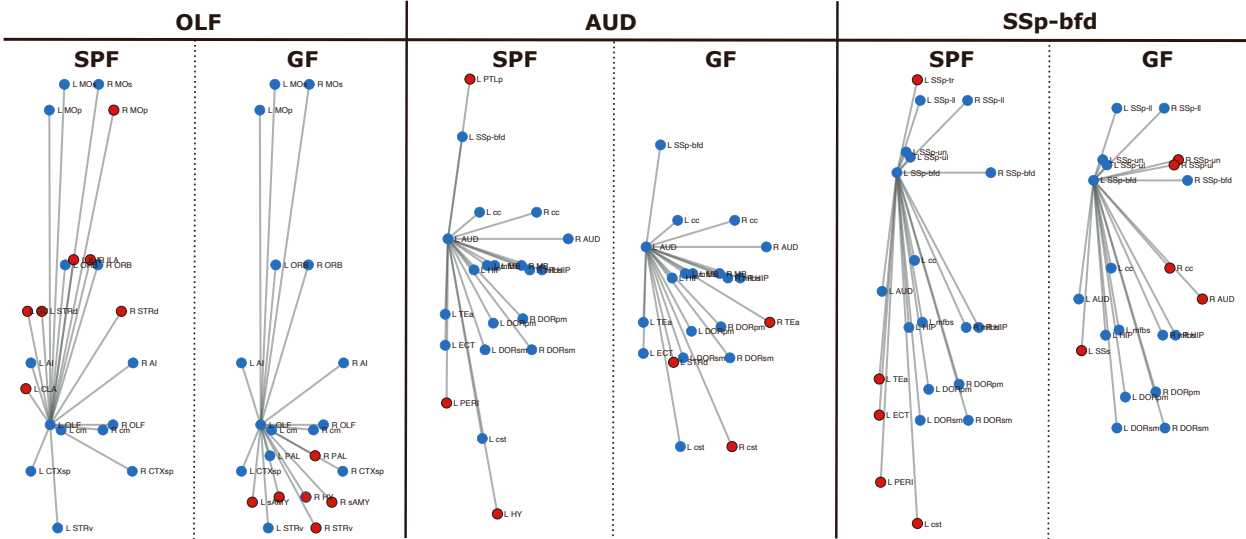

**Figure S2: No difference in top connections, related to Figure 1 “Germ-free mice with increased functional connectivity at the whole-brain level”.**

Graph illustration for the 20 top connections (i.e. highest edge weight) for 3 randomly chosen regions (OLF, AUD, and SSp-bfd) from the list of regions with highest degree in the GF group. Illustrations shown for left hemisphere with differences between left region in SPF vs. GF labeled in red.

**Table S1: All brain regions of the anatomical atlas used for the network analysis, related to STAR methods section “MRI postprocessing”.**

| Hemisphere                  | ID   | Hemisphere | ID   | Acronym | Name                                           |
|-----------------------------|------|------------|------|---------|------------------------------------------------|
| <b>Default mode network</b> |      |            |      |         |                                                |
| L                           | 31   | R          | 2031 | ACA     | Anterior cingulate area                        |
| L                           | 44   | R          | 2044 | ILA     | Infralimbic area                               |
| L                           | 714  | R          | 2714 | ORB     | Orbital area                                   |
| L                           | 972  | R          | 2972 | PL      | Prelimbic area                                 |
| L                           | 22   | R          | 2022 | PTLp    | Posterior parietal association areas           |
| L                           | 254  | R          | 2254 | RSP     | Retrosplenial area                             |
| L                           | 361  | R          | 2361 | SSp-tr  | Primary somatosensory area, trunk              |
| L                           | 337  | R          | 2337 | SSp-lI  | Primary somatosensory area, lower limb         |
| L                           | 993  | R          | 2993 | MOs     | Secondary motor area                           |
| <b>Sensorimotor network</b> |      |            |      |         |                                                |
| L                           | 985  | R          | 2985 | MOp     | Primary motor area                             |
| L                           | 993  | R          | 2993 | MOs     | Secondary motor area                           |
| L                           | 369  | R          | 2369 | SSp-ul  | Primary somatosensory area, upper limb         |
| L                           | 337  | R          | 2337 | SSp-lI  | Primary somatosensory area, lower limb         |
| L                           | 1098 | R          | 3098 | SSp-un  | Primary somatosensory area, unassigned         |
| L                           | 864  | R          | 2864 | DORsm   | Thalamus, sensory-motor cortex related         |
| L                           | 856  | R          | 2856 | DORpm   | Thalamus, polymodal association cortex related |
| L                           | 485  | R          | 2485 | STRd    | Striatum dorsal region                         |
| L                           | 493  | R          | 2493 | STRv    | Striatum ventral region                        |
| L                           | 803  | R          | 2803 | PAL     | Pallidum                                       |
|                             |      |            |      |         |                                                |
| L                           | 95   | R          | 2095 | AI      | Agranular insular area                         |
| L                           | 247  | R          | 2247 | AUD     | Auditory areas                                 |
| L                           | 519  | R          | 2519 | CBN     | Cerebellar nuclei                              |
| L                           | 528  | R          | 2528 | CBX     | Cerebellar cortex                              |
| L                           | 776  | R          | 2776 | cc      | Corpus callosum                                |
| L                           | 583  | R          | 2583 | CLA     | Clastrum                                       |
| L                           | 967  | R          | 2967 | cm      | Cranial nerves                                 |
| L                           | 784  | R          | 2784 | cst     | Corticospinal tract                            |
| L                           | 703  | R          | 2703 | CTXsp   | Cortical subplate                              |
| L                           | 895  | R          | 2895 | ECT     | Ectorhinal area                                |
| L                           | 1000 | R          | 3000 | eps     | Extrapyramidal fiber systems                   |
| L                           | 184  | R          | 2184 | FRP     | Frontal pole, cerebral cortex                  |
| L                           | 1057 | R          | 3057 | GU      | Gustatory areas                                |
| L                           | 1080 | R          | 3080 | HIP     | Hippocampal region                             |
| L                           | 1097 | R          | 3097 | HY      | Hypothalamus                                   |
| L                           | 896  | R          | 2896 | lfbst   | Thalamus related                               |
| L                           | 275  | R          | 2275 | LSX     | Lateral septal complex                         |
| L                           | 313  | R          | 2313 | MB      | Midbrain                                       |

|   |     |   |      |         |                                          |
|---|-----|---|------|---------|------------------------------------------|
| L | 991 | R | 2991 | mfbs    | Medial forebrain bundle system           |
| L | 354 | R | 2354 | MY      | Medulla                                  |
| L | 698 | R | 2698 | OLF     | Olfactory areas                          |
| L | 771 | R | 2771 | P       | Pons                                     |
| L | 803 | R | 2803 | PAL     | Pallidum                                 |
| L | 922 | R | 2922 | PERI    | Perirhinal area                          |
| L | 822 | R | 2822 | RHP     | Retrohippocampal region                  |
| L | 278 | R | 2278 | sAMY    | Striatum-like amygdalar nuclei           |
| L | 329 | R | 2329 | SSp-bfd | Primary somatosensory area, barrel field |
| L | 345 | R | 2345 | SSp-m   | Primary somatosensory area, mouth        |
| L | 353 | R | 2353 | SSp-n   | Primary somatosensory area, nose         |
| L | 378 | R | 2378 | SSs     | Supplemental somatosensory area          |
| L | 541 | R | 2541 | TEa     | Temporal association areas               |
| L | 669 | R | 2669 | VIS     | Visual areas                             |
| L | 677 | R | 2677 | VISC    | Visceral area                            |
